# Supplementary material for: Effects of Cinnamon Powder on Glucose Metabolism in Diabetic Mice and the Molecular Mechanisms
Source: MDPI journal article supplement (doi:10.3390/foods12203852), 2023-10-20
Supplement: s1 [file s1]

Table S1. The composition of CP

| Composition         | Content                      |
|---------------------|------------------------------|
| Total carbohydrates | 14.20±1.10 g/100g dry weight |
| Protein content     | 4.71±0.08 g/100g dry weight  |
| Total fat content   | 0.90±0.00 g/100g dry weight  |
| Total dietary fiber | 69.90±1.20 g/100g dry weight |
| Ash content         | 4.30±0.00 g/100g dry weight  |
| Total polyphenols   | 71.62 ± 0.40μg/g dry weight  |
| Total flavonoids    | 58.05 ±1.43 μg/g dry weight  |

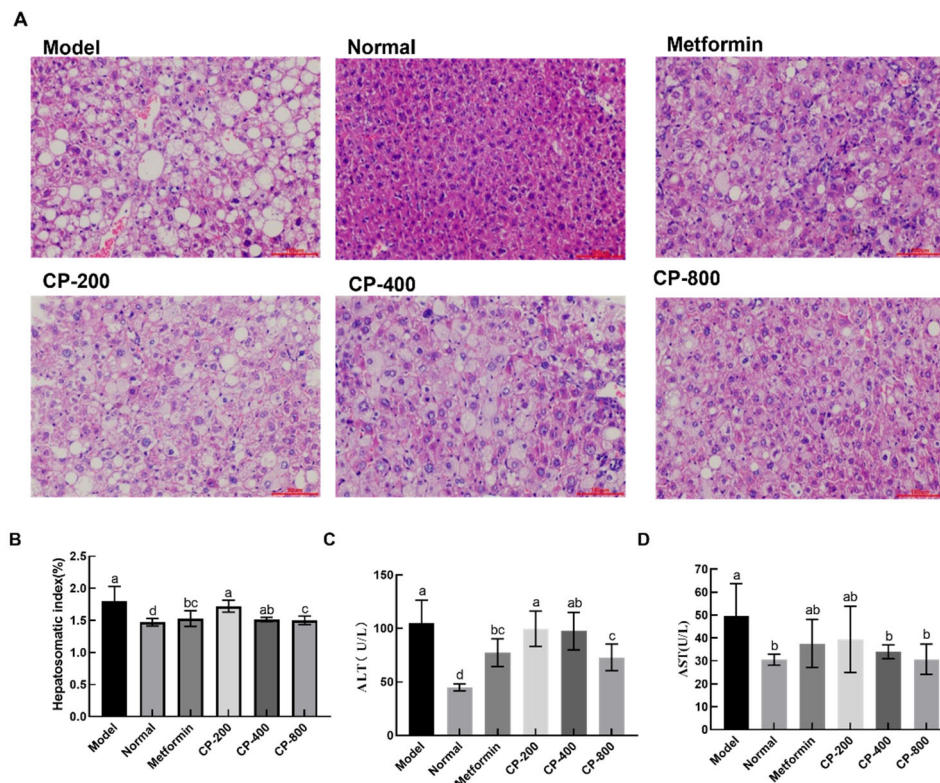

Figure S1. Effect of CP treatment on liver morphology (A) (H&E staining 200×), Hepatosomatic index values (B), ALT activity (C), and AST activity (D) in the liver tissues of T2DM mice.
